# Supplementary material
Source: publisher site journal article supplement (https://www.dovepress.com/article/331137)
Supplement: Supplementary file 1 [file get_supplementary_file.php]

## APPENDIX 1: Focus group discussion interview guide

### SECTION A

To be filled by the researcher

|                                                                                    |        |  |
|------------------------------------------------------------------------------------|--------|--|
| 1. Gender of participant                                                           | Female |  |
|                                                                                    | Male   |  |
| 2. Level of study                                                                  | 1      |  |
|                                                                                    | 2      |  |
|                                                                                    | 3      |  |
|                                                                                    | 4      |  |
| 3. Ward or section where participant worked during resumption of clinical practice |        |  |

### SECTION B

#### MAIN QUESTION:

1. What were your fears regarding resumption of clinical practice in the midst of COVID 19 Pandemic in relation to

- a. The environment you were working in
- b. The patients you were handling
- c. Support by clinical staff and lecturers
- d. Community where you were staying
- e. Transport used to and from work
- f. Orientation to COVID 19

2. Follow ups

3. The timing of orientation

4. the content of presentation for orientation

- a. Describe what actually caused such fears?
- b. How are/ were you coping with such fears as you provide/provided nursing care to the patients?
- c. What would you propose as the best that could have been done apart from what was done in regard to the resumption of clinical practice?
